# Supplementary material
Source: MDPI journal article supplement (https://www.mdpi.com/search?q=forests-11-01030)
Supplement: s001 [file forests-11-01030-s001.pdf]

# Diversity, Abundance, and Distribution of Wood-Decay Fungi in Major Parks of Hong Kong

Shunping Ding <sup>1,2,\*</sup>, Hongli Hu <sup>2,3</sup> and Ji-Dong Gu <sup>2,4,\*</sup>

<sup>1</sup> Wine and Viticulture, California Polytechnic State University, 1 Grand Ave., San Luis Obispo, CA 93407, USA

<sup>2</sup> Laboratory of Environmental microbiology and Toxicology, School of Biological Sciences, Faculty of Science, The University of Hong Kong, Pokfulam Road, Hong Kong 999077, China

<sup>3</sup> Ministry of Agriculture Key Laboratory of Subtropical Agro-Biological Disaster and Management, Fujian Agriculture and Forestry University, Fuzhou 350002, China; huhongli7905@gmail.com

<sup>4</sup> Environmental Engineering, Guangdong Technion-Israel Institute of Technology, 241 Daxue Road, Shantou, Guangdong 515041, China

\* Correspondence: [sding01@calpoly.edu](mailto:sding01@calpoly.edu) (S.D.); [jidong.gu@gtiit.edu.cn](mailto:jidong.gu@gtiit.edu.cn) (J.-D.G.)

## Supplemental

**Table S1.** A list of reference sequences from GenBank with accession numbers, strain numbers, and hosts (if applicable) that were used in the phylogenetic analysis.

| Fungal species                      | GenBank accession numbers (ITS rDNA) | Strain numbers    | Hosts (if applicable)      |
|-------------------------------------|--------------------------------------|-------------------|----------------------------|
| <i>Ganoderma neojaponicum</i>       | JQ520193                             | ASI 7032          |                            |
| <i>Ganoderma oregonense</i>         | JQ520197                             | ASI 7067          |                            |
| <i>Ganoderma resinaceum</i>         | JQ520200                             | CBS 152.27        |                            |
| <i>Ganoderma weberianum</i>         | JQ520219                             | CBS 219.36        |                            |
| <i>Ganoderma weberianum</i>         | AY569451                             | SUT H2            |                            |
| <i>Ganoderma sichuanense</i>        | JF915397                             | HMAS240187        |                            |
| <i>Ganoderma meredithae</i>         | JQ520191                             | ASI 7140          |                            |
| <i>Ganoderma tropicum</i>           | JF915410                             | HMAS263143        |                            |
| <i>Ganoderma lucidum</i>            | GU726933                             | GL23              |                            |
| <i>Ganoderma lucidum</i>            | HM053462                             | GL-43             |                            |
| <i>Ganoderma applanatum</i>         | GU213472                             | Gap-1             |                            |
| <i>Ganoderma gibbosum</i>           | AY593854                             | AS5.624           |                            |
| <i>Ganoderma gibbosum</i>           | AY593857                             | AS5.624           |                            |
| <i>Fomes fomentarius</i>            | HQ189534                             | KYJ3              | <i>Fagus sylvatica</i>     |
| <i>Earliella scabrosa</i>           | JN165008                             | JN165008          |                            |
| <i>Lentinus tigrinus</i>            | AF516518                             | LE(BIN)0861 SBI 5 |                            |
| <i>Trametes mimites</i>             | JN645074                             | MUCL:39660        |                            |
| <i>Lenzites tricolor</i>            | JN645096                             | BRFM<FRA>:954     |                            |
| <i>Daedaleopsis confragosa</i>      | FR686551                             | 4                 | <i>Salix alba</i>          |
| <i>Hexagonia nitida</i>             | JN645082                             | BRFM<FRA>:1327    |                            |
| <i>Hexagonia tenuis</i>             | JN003683                             | C051              |                            |
| <i>Hexagonia tenuis</i>             | KC414233                             | D16               |                            |
| <i>Phlebiopsis gigantea</i>         | JN017925                             | NZFS3367          | <i>Pinus radiata</i>       |
| <i>Phanerochaete crassa</i>         | AY219341                             | FP-102496-sp      |                            |
| <i>Hyphodermella corrugata</i>      | FN600379                             | MA-Fungi 26186    |                            |
| <i>Ceriporia lacerata</i>           | AB566279                             | IFM 56968         |                            |
| <i>Ceriporia lacerata</i>           | FJ462746                             | T140              |                            |
| <i>Meripilus giganteus</i>          | FR686567                             | 20                | <i>Fagus sylvatica</i>     |
| <i>Elmerina caryae</i>              | JQ673151                             | DLL2009-077       |                            |
| <i>Rigidoporus crocatus</i>         | JQ673153                             | DLL2009-096       |                            |
| <i>Physisporinus sanguinolentus</i> | FJ496671                             | BRNM 699576       |                            |
| <i>Rigidoporus vinctus</i>          | JQ409459                             | JV0610_B5         | hardwood                   |
| <i>Physisporinus vitreus</i>        | FM202496                             | 136               |                            |
| <i>Physisporinus vitreus</i>        | JN182920                             | 159               |                            |
| <i>Phellinus noxius</i>             | HQ400698                             | FRIM638           | <i>Azadirachta excelsa</i> |
| <i>Phellinus noxius</i>             | FR821769                             | FR821769          |                            |
| <i>Phellinus noxius</i>             | JQ003238                             | tf566-w           |                            |
| <i>Phellinus alni</i>               | GQ383730                             | BRNM 714865       | <i>Alnus incana</i>        |
| <i>Phellinus nigricans</i>          | GQ383722                             | PRM 896666        | <i>Betula</i> sp.          |

|                                   |          |                |                        |
|-----------------------------------|----------|----------------|------------------------|
| <i>Phellinus lundellii</i>        | AY340058 | Dai2684        |                        |
| <i>Phellinus populicola</i>       | GQ383705 | MJ 92/96       | <i>Populus tremula</i> |
| <i>Phellinus igniarius</i>        | GQ383716 | 1023           | <i>Salix cf. alba</i>  |
| <i>Phellinus tremulae</i>         | GQ383781 | GQ383781       | <i>Populus tremula</i> |
| <i>Phellinus tuberculosu</i>      | GQ383783 | MJ 44/07       | <i>Prunus spinosa</i>  |
| <i>Phellinus laevigatus</i>       | GQ383778 | BRNM 714867    | <i>Betula sp.</i>      |
| <i>Phellinus betulinus</i>        | GQ383776 | UPS F-124579   | <i>Betula sp.</i>      |
| <i>Fomitiporia torreyae</i>       | JQ087896 | MUCL 47628     |                        |
| <i>Fomitiporia tsugina</i>        | JQ087898 | MUCL 52702     |                        |
| <i>Fomitiporia aethiopica</i>     | GU478341 | MUCL 44777     |                        |
| <i>Fomitiporia pseudopunctata</i> | GU461948 | MUCL 51325     |                        |
| <i>Fomitiporia punicata</i>       | GU461975 | Cui26          |                        |
| <i>Fomitiporia mediterranea</i>   | AY849303 | FM-Un          |                        |
| <i>Fuscoporia ferrea</i>          | JQ673174 | DLL2009-035    |                        |
| <i>Fuscoporia torulosa</i>        | AY558649 | CBS 182.34     |                        |
| <i>Fuscoporia callimorpha</i>     | JF692191 | JV090487       | hardwood               |
| <i>Fuscoporia senex</i>           | JX463658 | KUC20110922-13 |                        |
| <i>Fuscoporia senex</i>           | AY558647 | CBS 442.76     |                        |

---

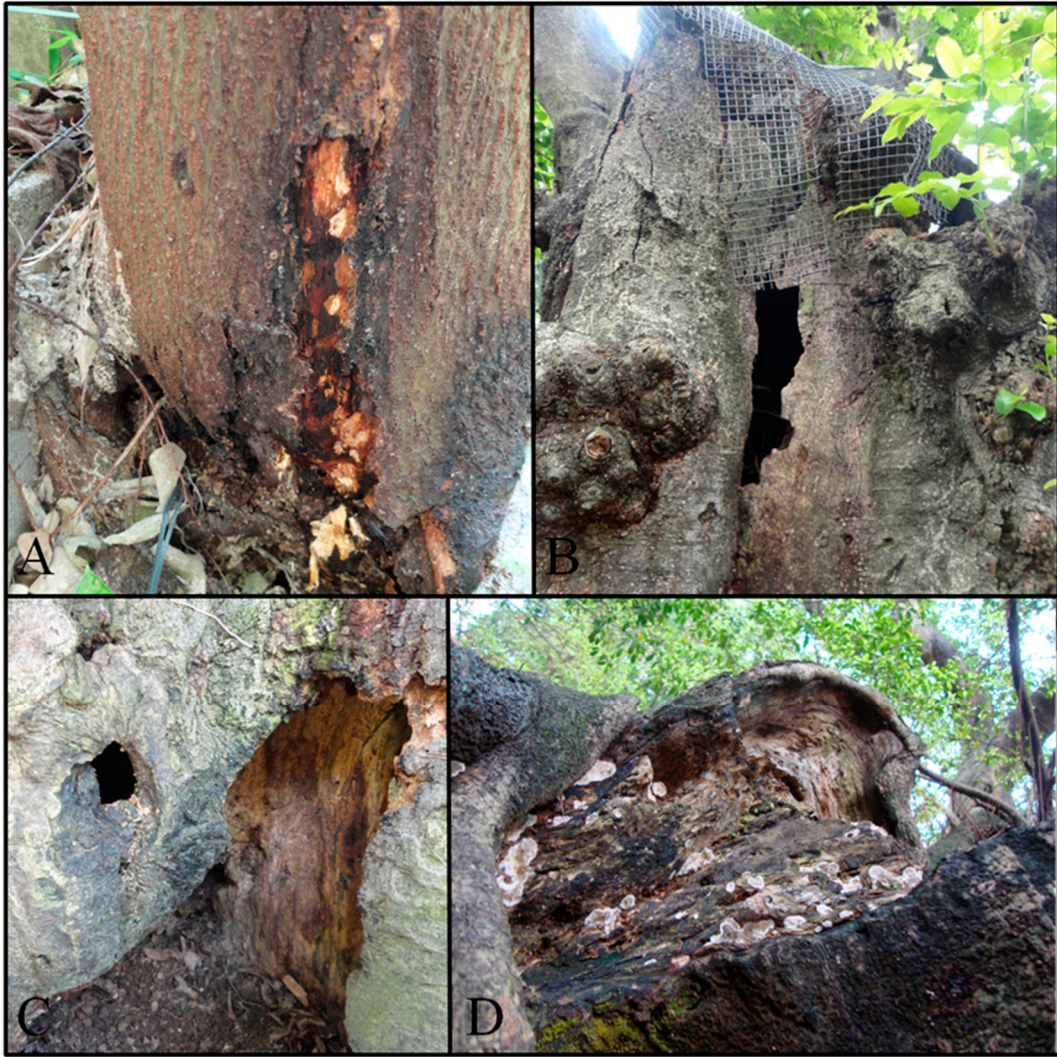

**Figure S1.** Photographs showing wood-rot on trees. A. Rot at the stem base of *Aleurites moluccana* at Hong Kong Observatory Grounds; B. Cavity in the stem of *Drypetes roxburghii* at Hong Kong Zoological and Botanical Garden; C. Cavity at the stem base of *Ficus microcarpa* in Hong Kong Park; D. Rot at the wound of *F. microcarpa* in Kowloon Park.

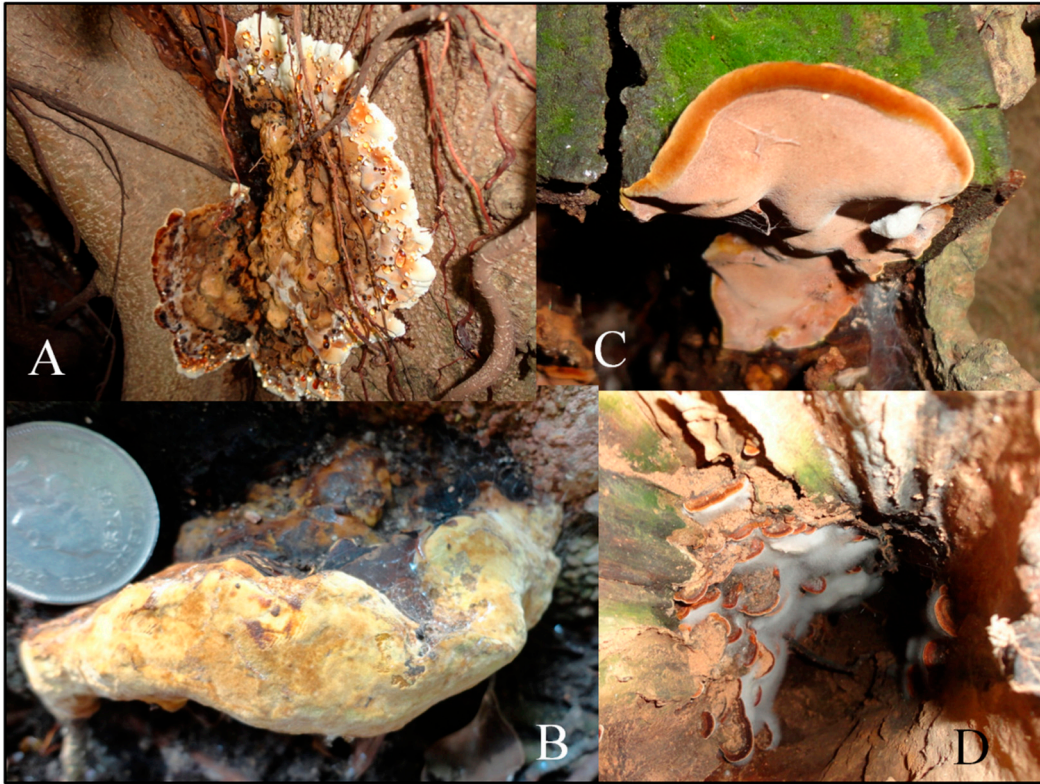

**Figure S2.** Fruiting bodies of *P. noxius* and *F. senex*. A. Fruiting body of *P. noxius* on *F. microcarpa* (YTM/65) located in Kowloon Park; B. Fruiting body of *P. noxius* on *F. microcarpa* (CW/110) located in Hong Kong Park; C. Fruiting body of *F. senex* on *S. samarangense* in ZBG; D. Fruiting body of *F. senex* on *S. japonica* (CW/62) located in Hong Kong Zoo and Botanical Park.

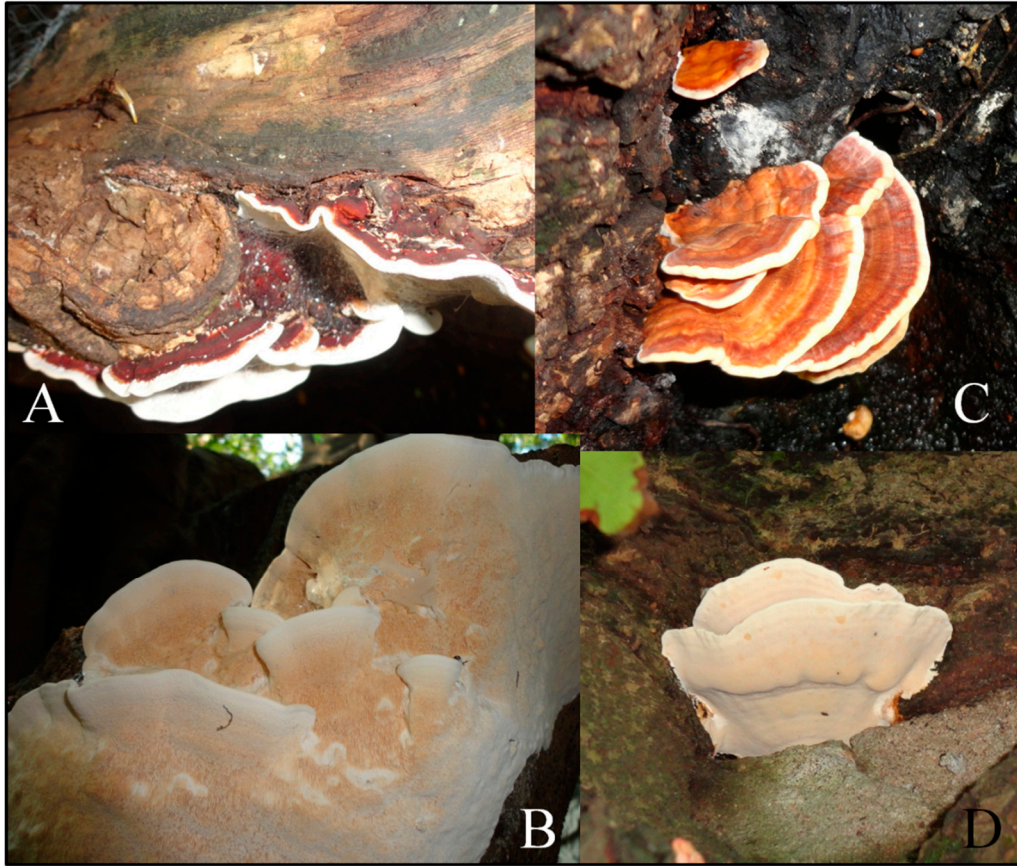

**Figure S3.** Fruiting bodies of *E. scabrosa* and *P. vitreus*. A. Fruiting body of *E. scabrosa* on *F. microcarpa* (YTM/65) located in Kowloon Park; B. Back of the fruiting body of *E. scabrosa* on *F. microcarpa* (YTM/65) located in Kowloon Park; C. Fruiting body of *P. vitreus* on *L. rhodostegia* (CW/58) located in Hong Kong Zoological and Botanical Park; D. Back of the fruiting body of *P. vitreus* on *L. rhodostegia* (CW/58) located in Hong Kong Zoological and Botanical Park.

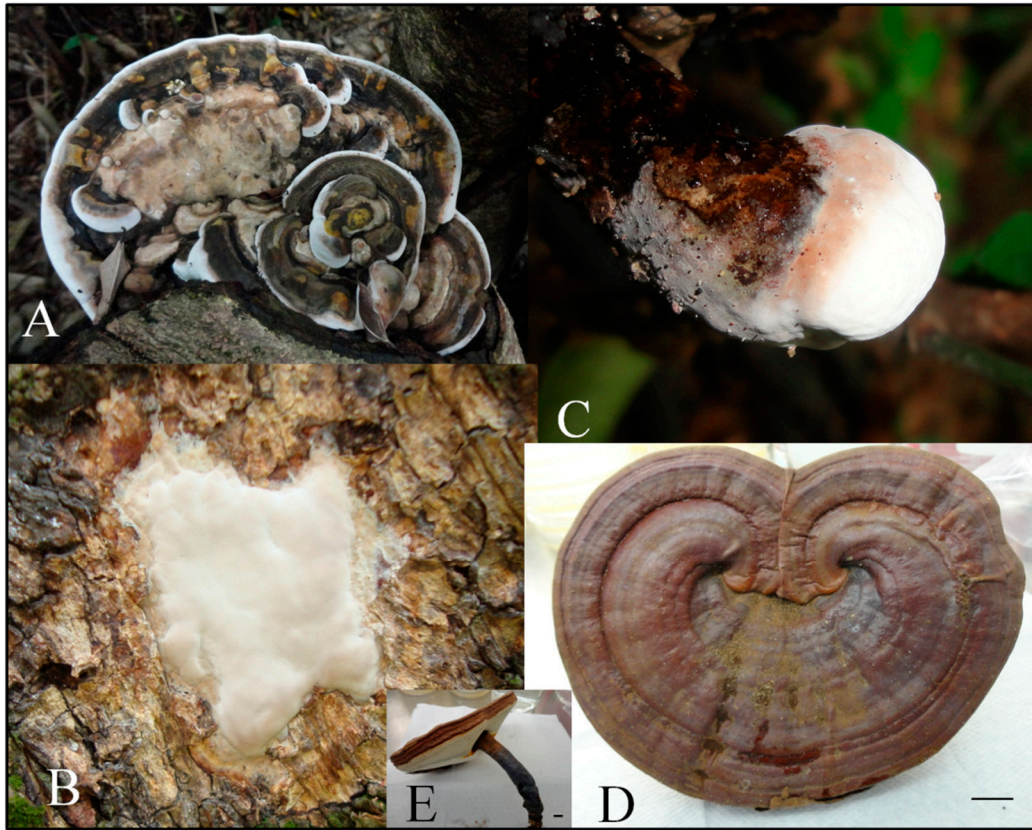

**Figure S4.** Fruiting bodies of *Ganoderma* spp. A. Fruiting body of *G. gibbosum* on *F. microcarpa* (CW/107) located in Hong Kong Park; B. Fruiting body of *G. applanatum* on *F. microcarpa* (YTM/92) located in Kowloon Park; C. Fruiting body of *G. gibbosum* on wood stump located in Hong Kong Park; D. Fruiting body of *G. lucidum* collected around *A. lebeck* in Hong Kong Observatory Grounds; E. Back of fruiting body of *G. lucidum* collected around *A. lebeck* in Hong Kong Observatory Grounds. (Bars in D and E represent 1 cm)
